# Supplementary material for: Metabolism of crucifer phytoalexins in Sclerotinia sclerotiorum: detoxification of strongly antifungal compounds involves glucosylation
Source: Royal Society of Chemistry journal article supplement (doi:10.1039/b604400j), 2006-01-01
Supplement: b604400j.pdf [file b604400j.pdf]

Supplementary Information for Manuscript

Metabolism of Crucifer Phytoalexins in *Sclerotinia sclerotiorum*: detoxification of strongly antifungal compounds involves glucosylation

M. Soledade C. Pedras\* and Mohammad Hossain

Department of Chemistry, University of Saskatchewan, 110 Science Place,  
Saskatoon, SK S7N 5C9, Canada

Corresponding Author: M. Soledade C. Pedras  
Department of Chemistry,  
University of Saskatchewan,  
110 Science Place,  
Saskatoon, SK S7N 5C9, Canada  
Telephone: 1-306-966-4772  
Fax: 1-306-966-4730  
E-mail: [s.pedras@usask.ca](mailto:s.pedras@usask.ca)

1- $\beta$ -D-Glucopyranosylbrassilexin (**12**, CD<sub>3</sub>OD)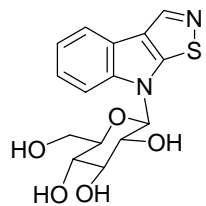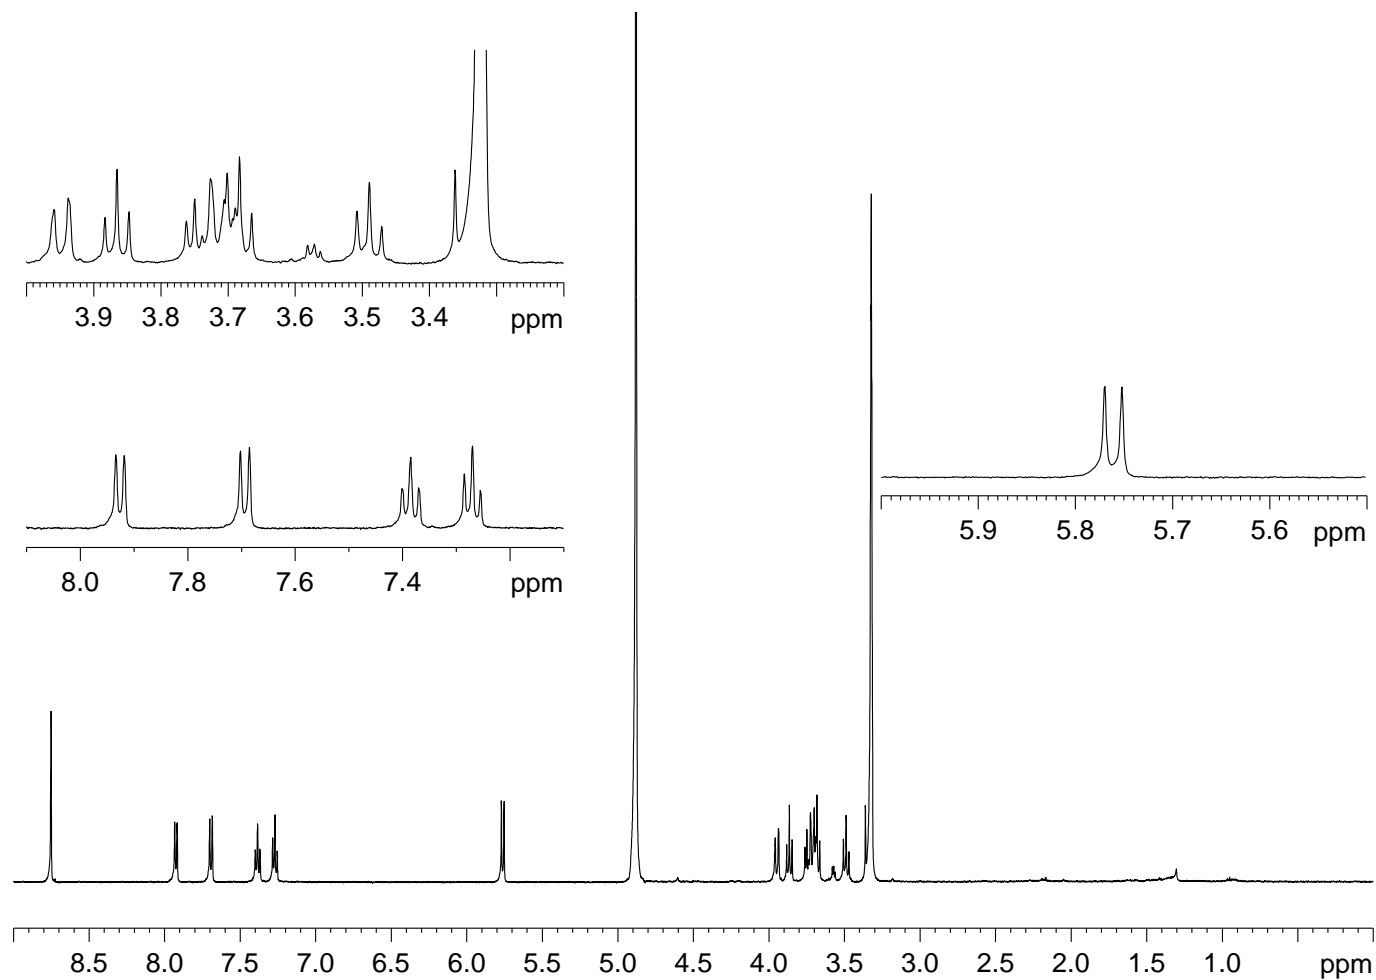

6-Hydroxysinalexin (**16**, CD<sub>3</sub>CN)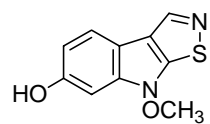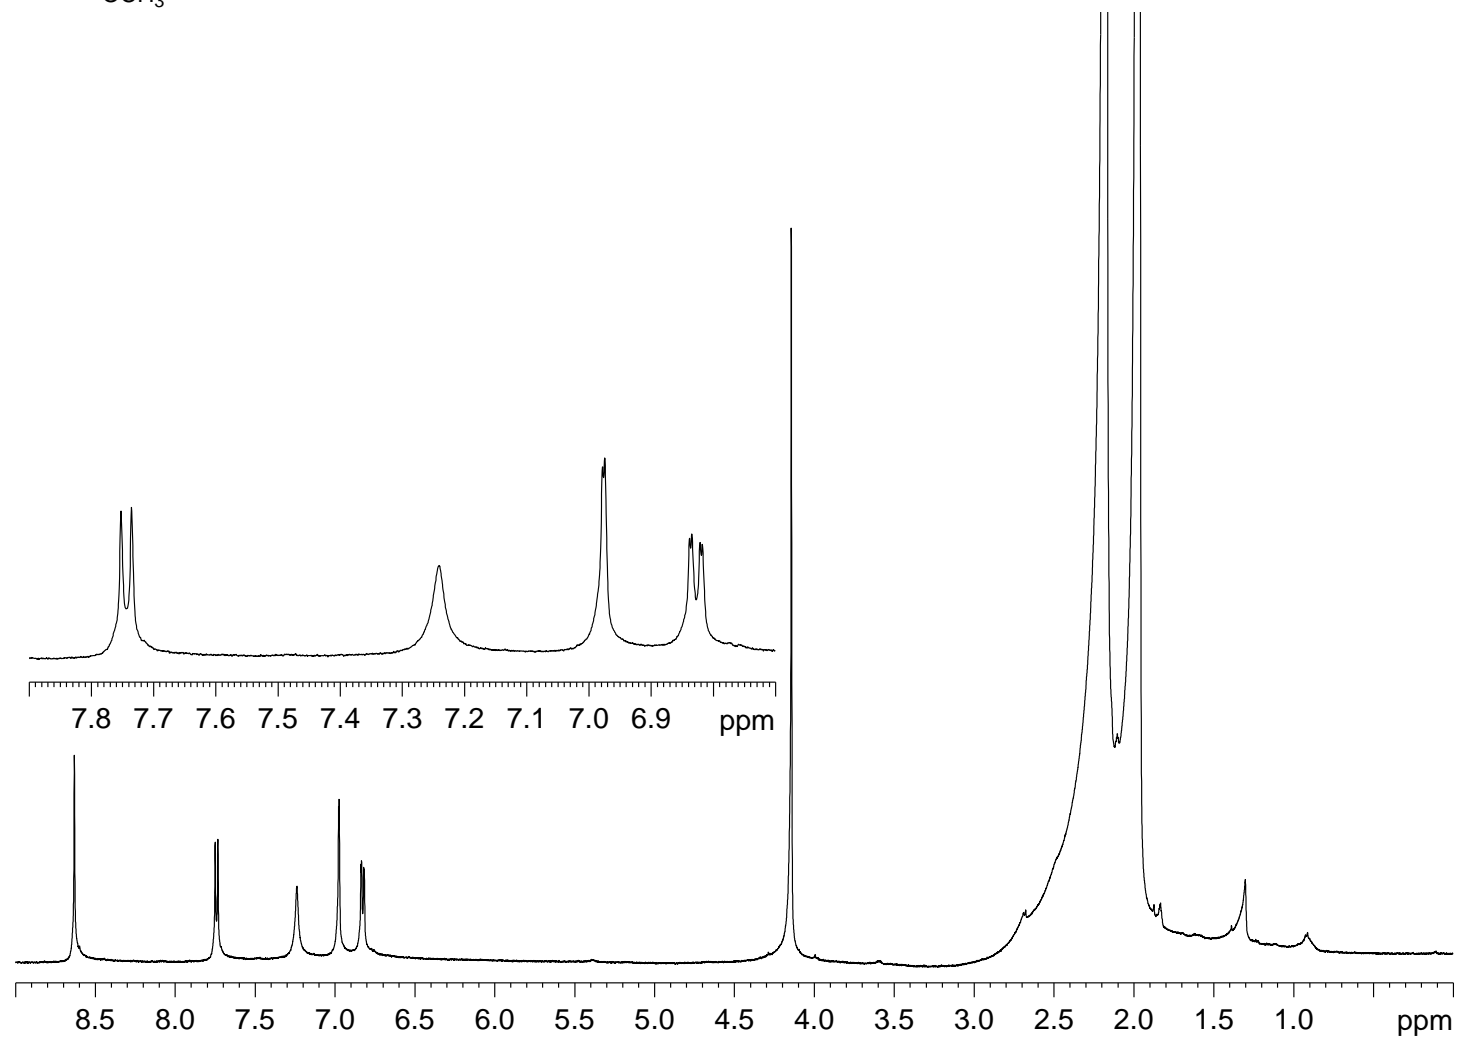

6-*O*- $\beta$ -D-Glucopyranosylsinalexin [17, (CD<sub>3</sub>)<sub>2</sub>CO]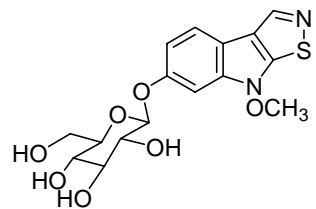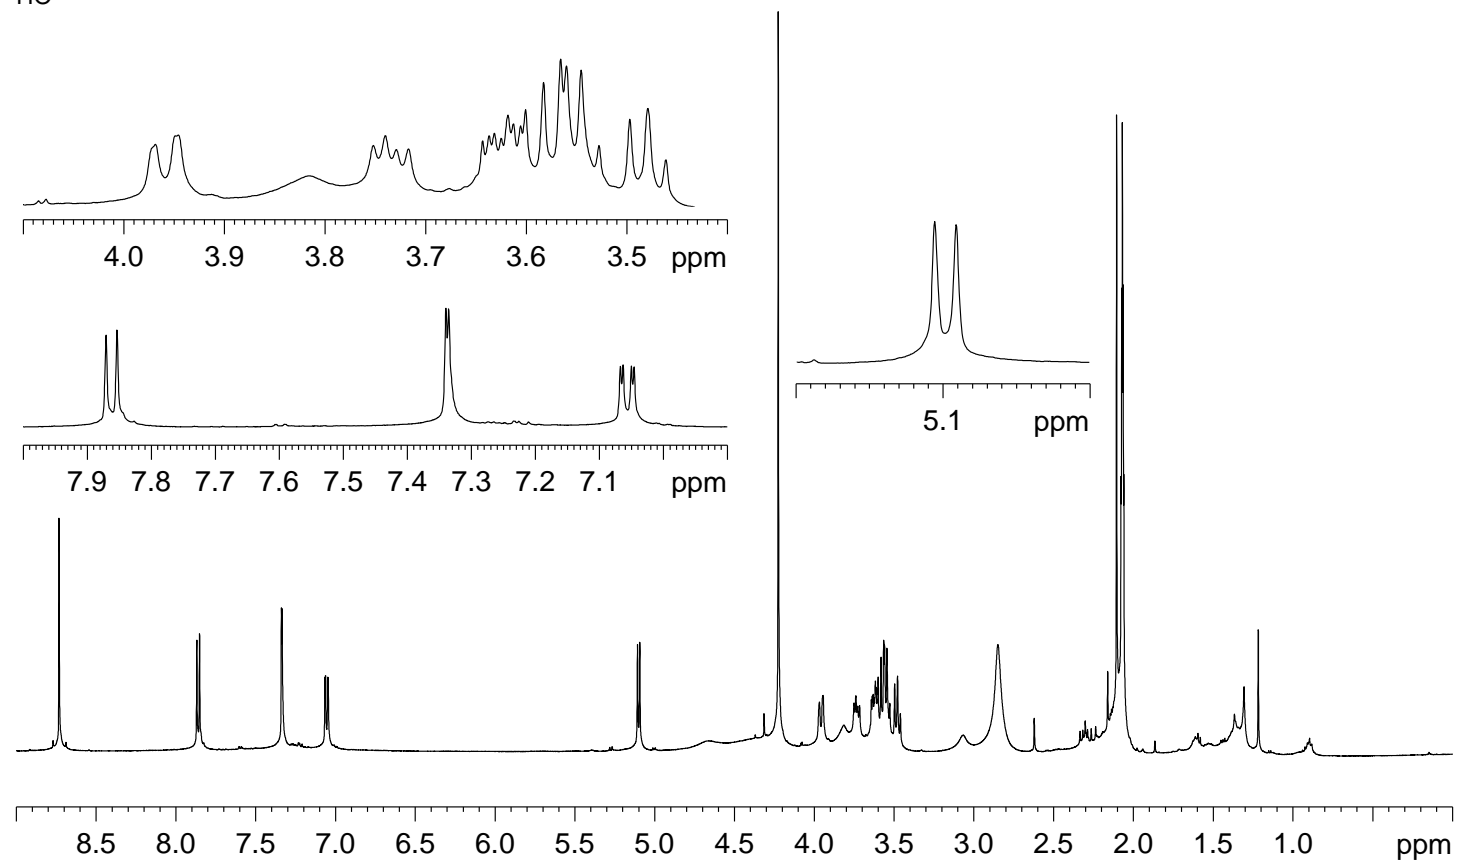

1-(*O*- $\beta$ -D-Glucopyranosyl)methylbrassicalexin [**19**, (CD<sub>3</sub>)<sub>2</sub>CO]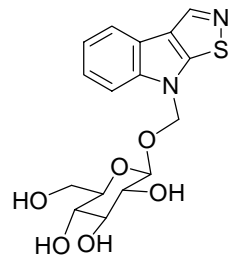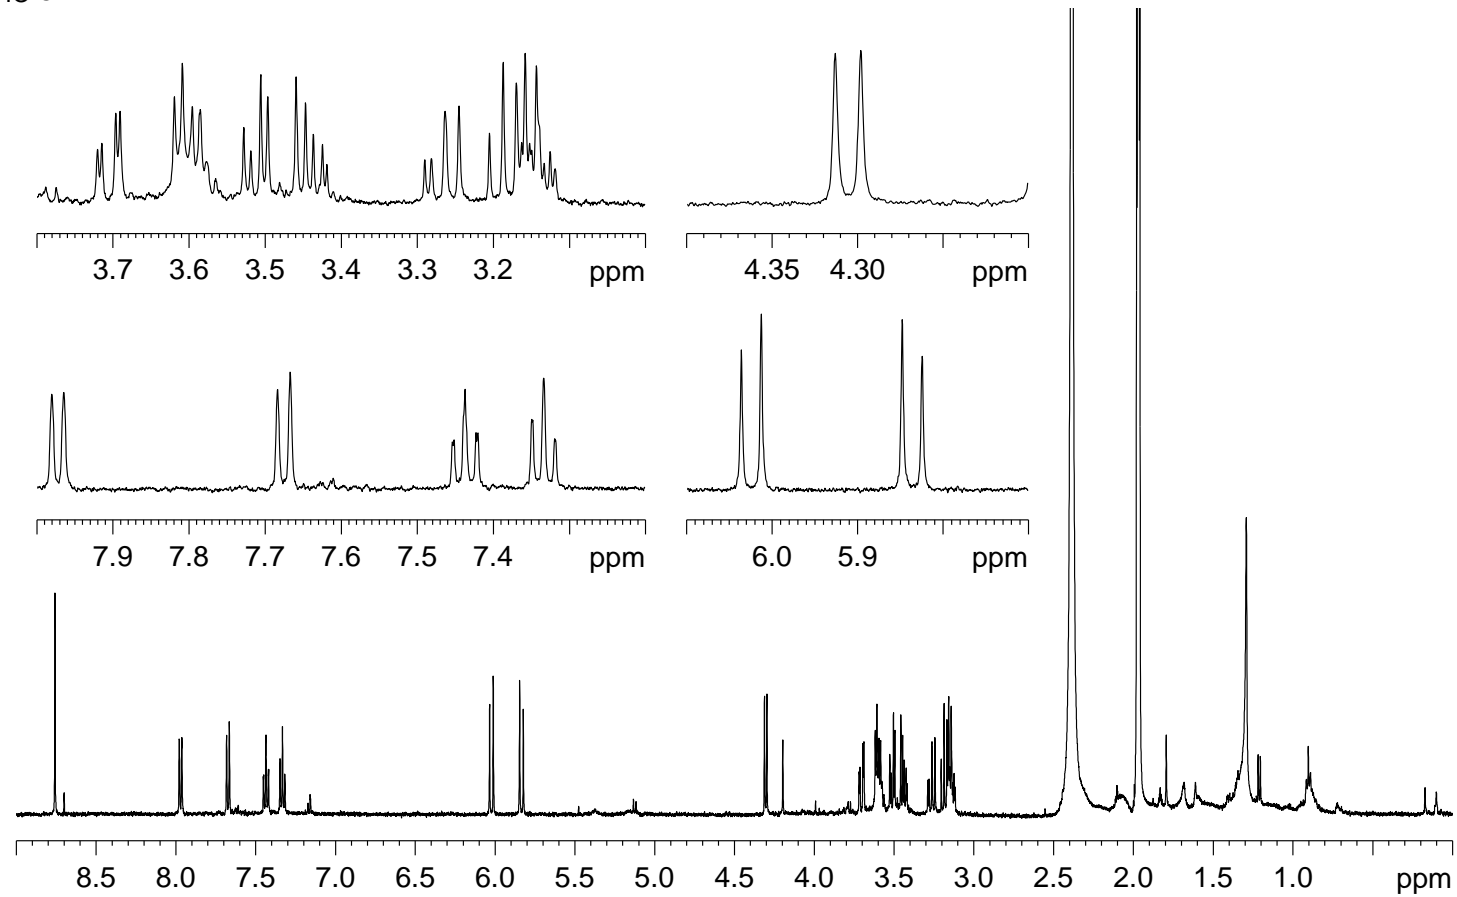

Spiro[3H-indole-3,5'-thiazolidin]-2(1H),2'-dione (**23**, CD<sub>3</sub>CN)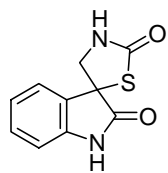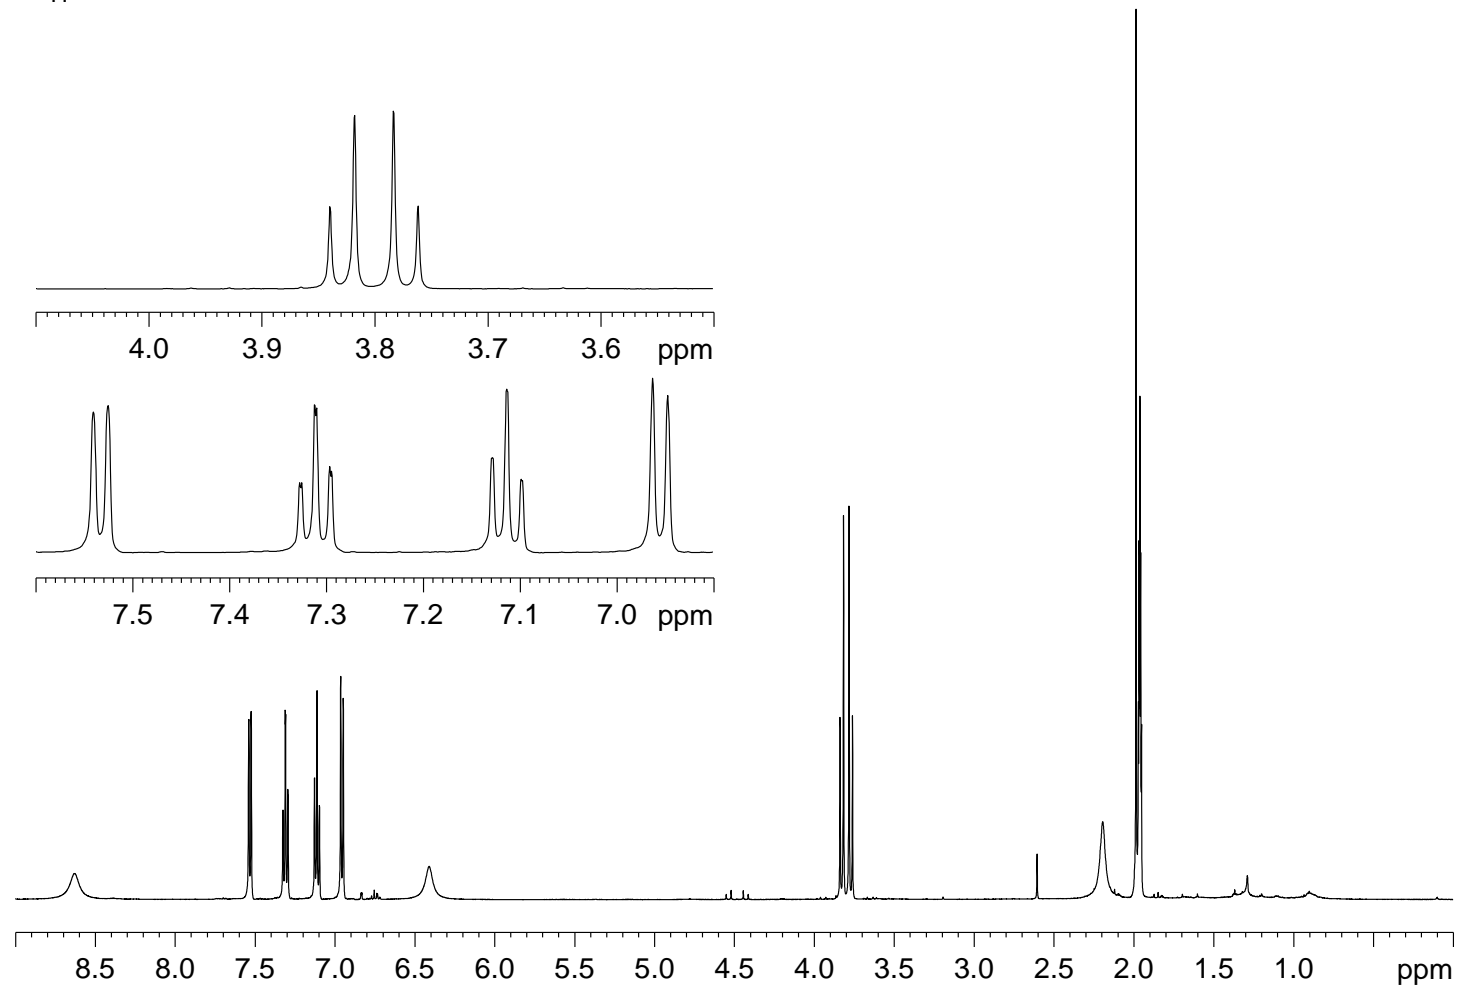

1-Methoxyspiro[3H-indole-3,5'-thiazolidin]-2(1H),2'-dione (**25**, CD<sub>3</sub>CN)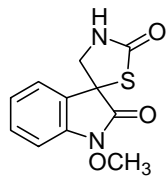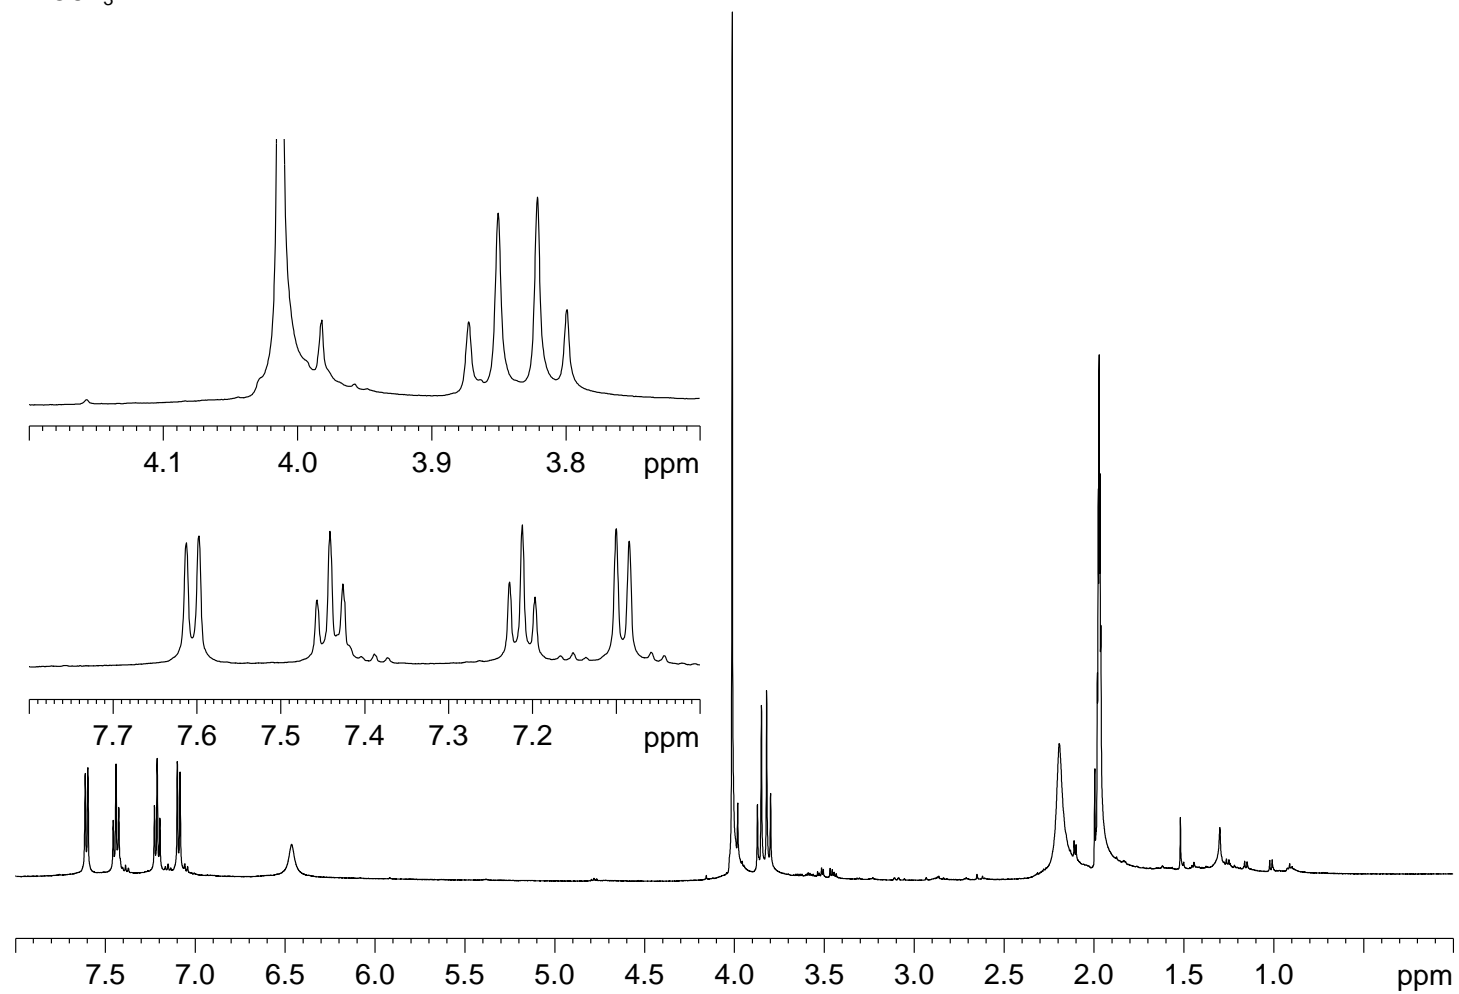

1-Methoxy-2'-thioxospiro[3H-indole-3,5'-thiazolidin]-2(1H)-one (**26**, CD<sub>3</sub>CN)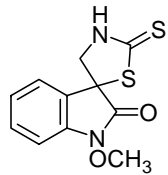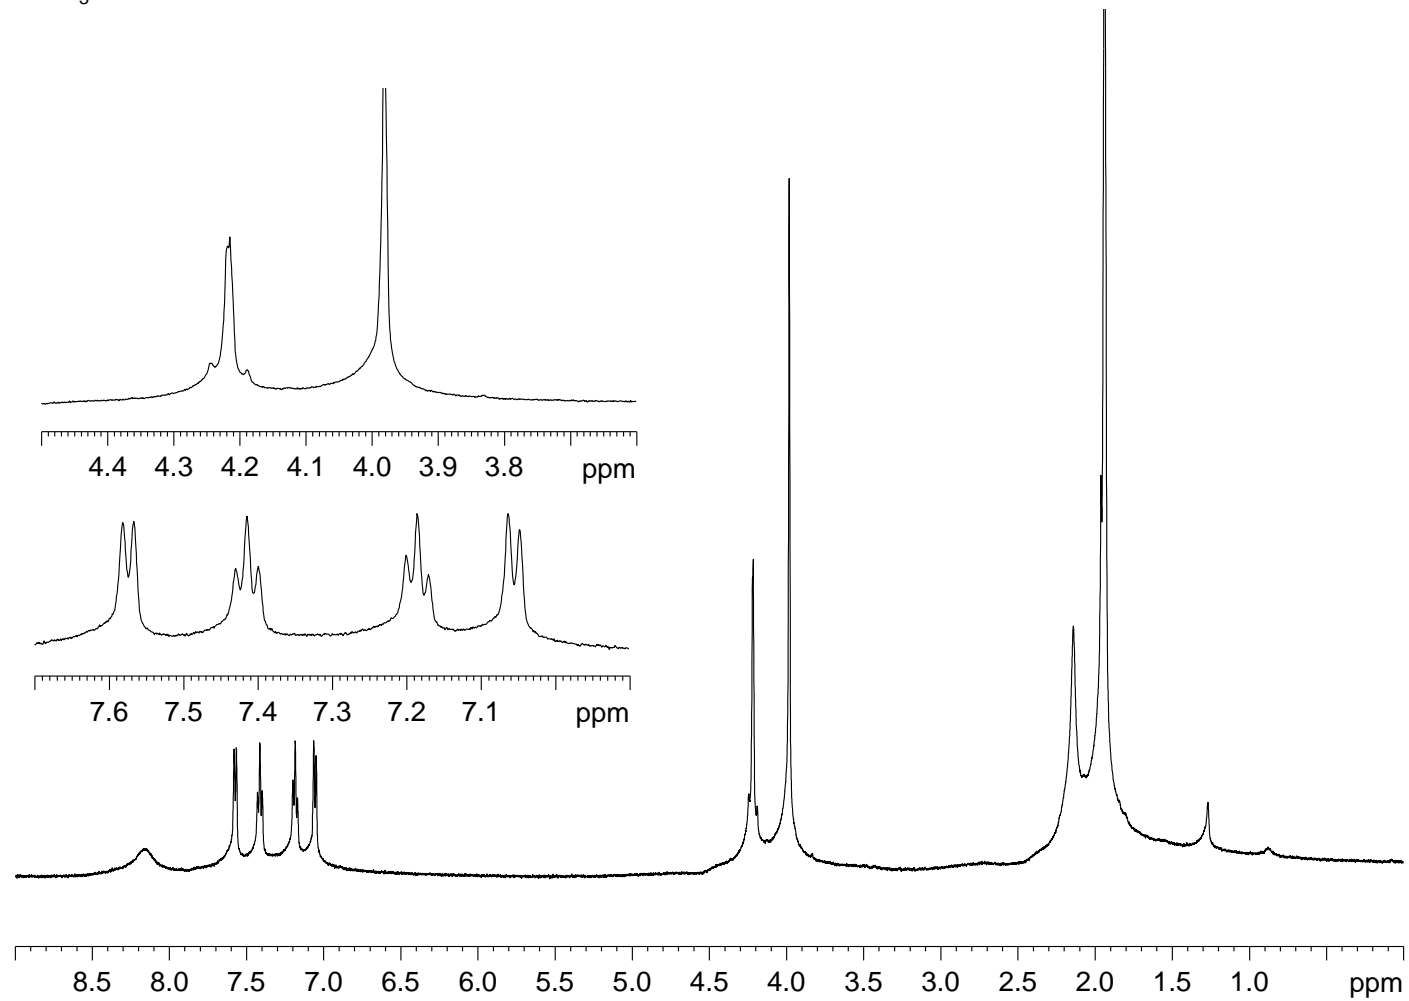



1-Methylspirobrassinin (**27**, CD<sub>3</sub>CN)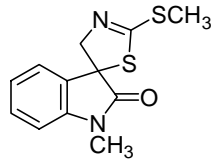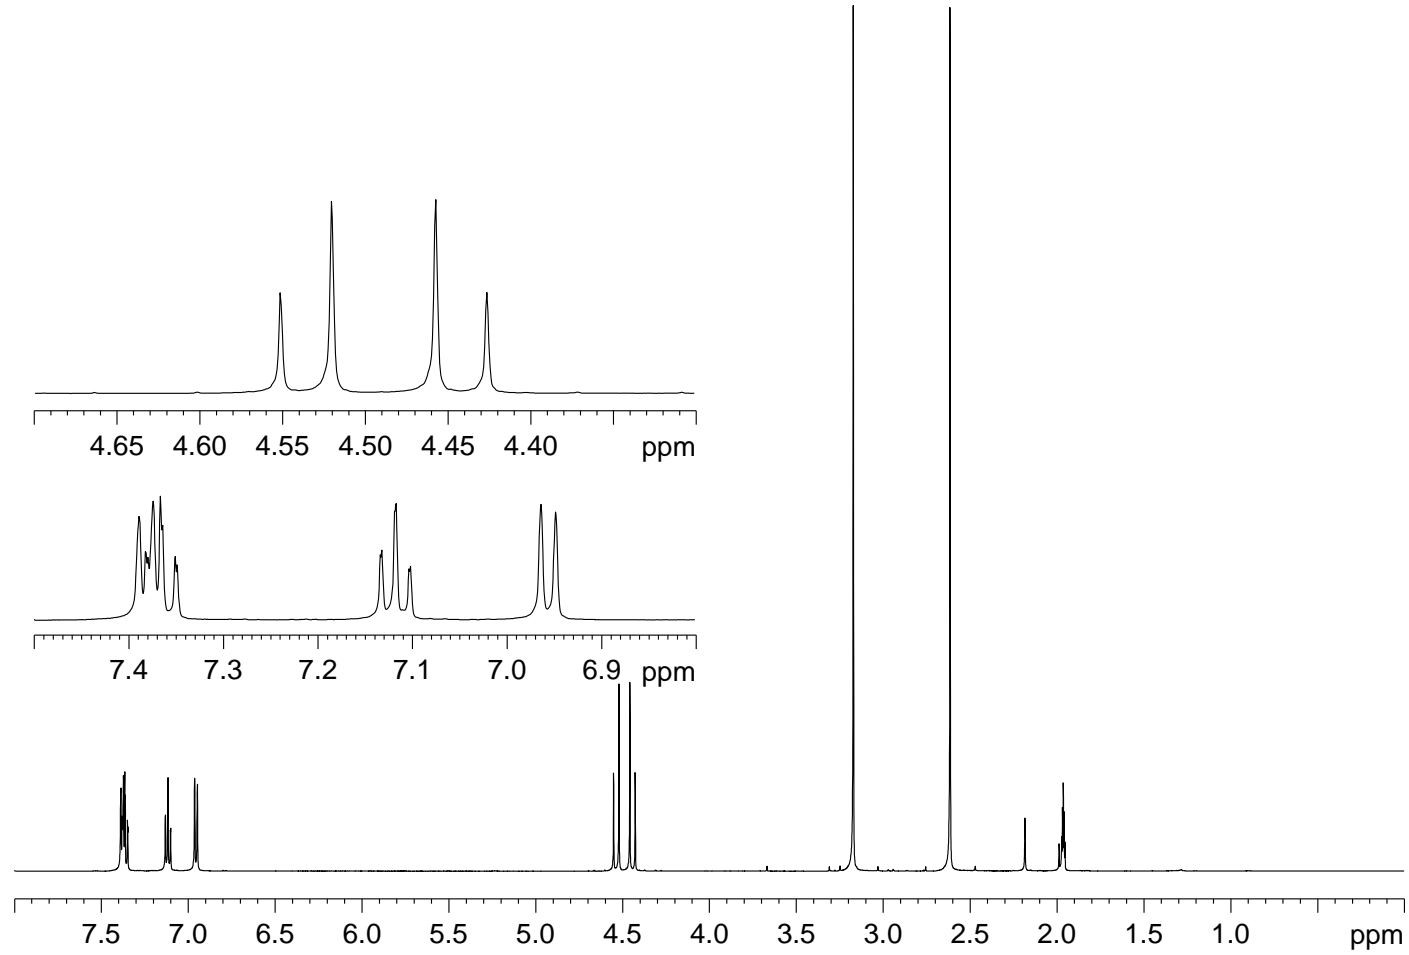

1-Methylspiro[3H-indole-3,5'-thiazolidin]-2(1H),2'-dione (**28**, CD<sub>3</sub>CN)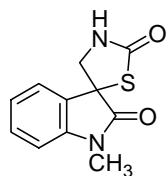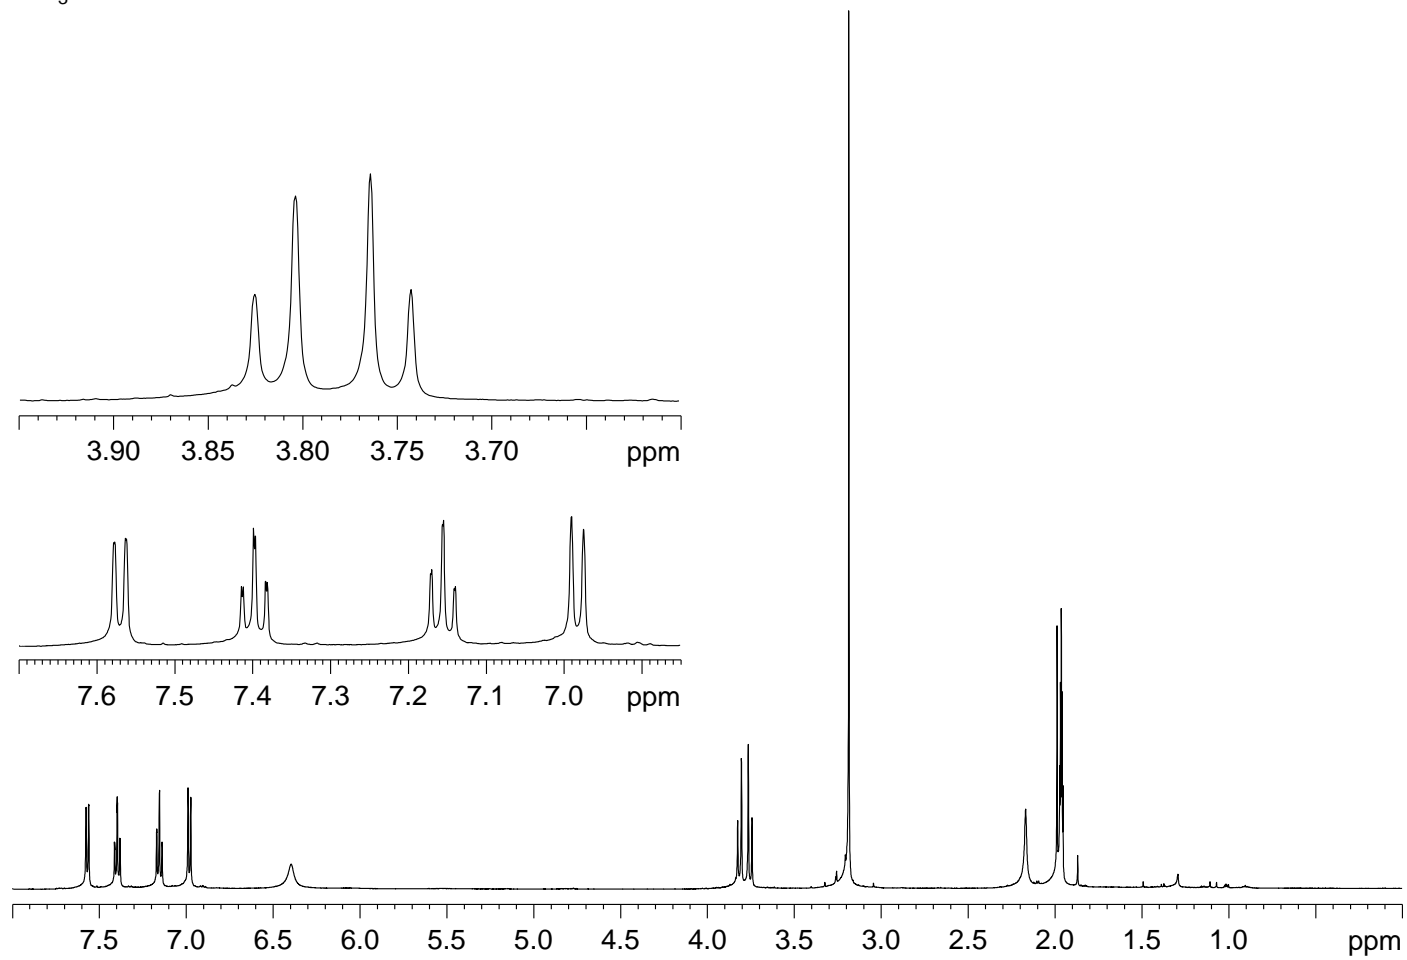

2,3,4,6-Tetra-*O*-acetyl-1- $\beta$ -D-glucopyranosyl brassilexin (**31**, CD<sub>2</sub>Cl<sub>2</sub>)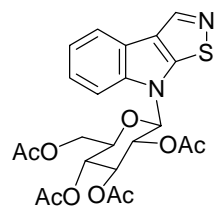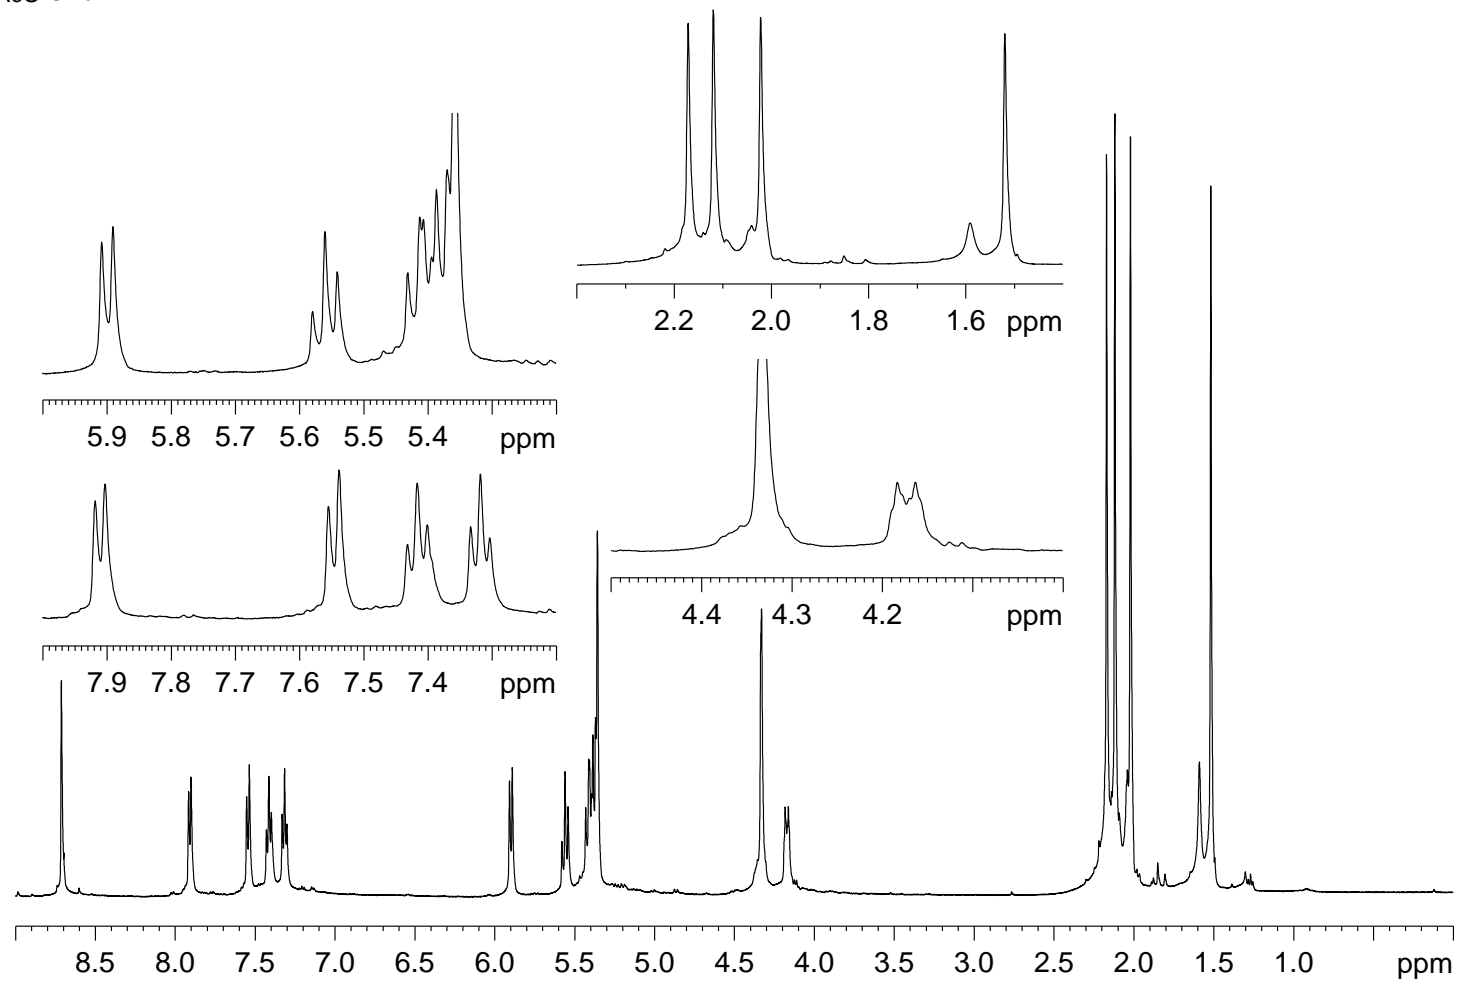

1-[1-(3,4,6-Tri-*O*-acetyl-1,2-*O*- $\alpha$ -D-glucopyranosyl)ethylidene]brassilexin (**32**, CD<sub>2</sub>Cl<sub>2</sub>)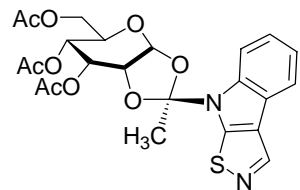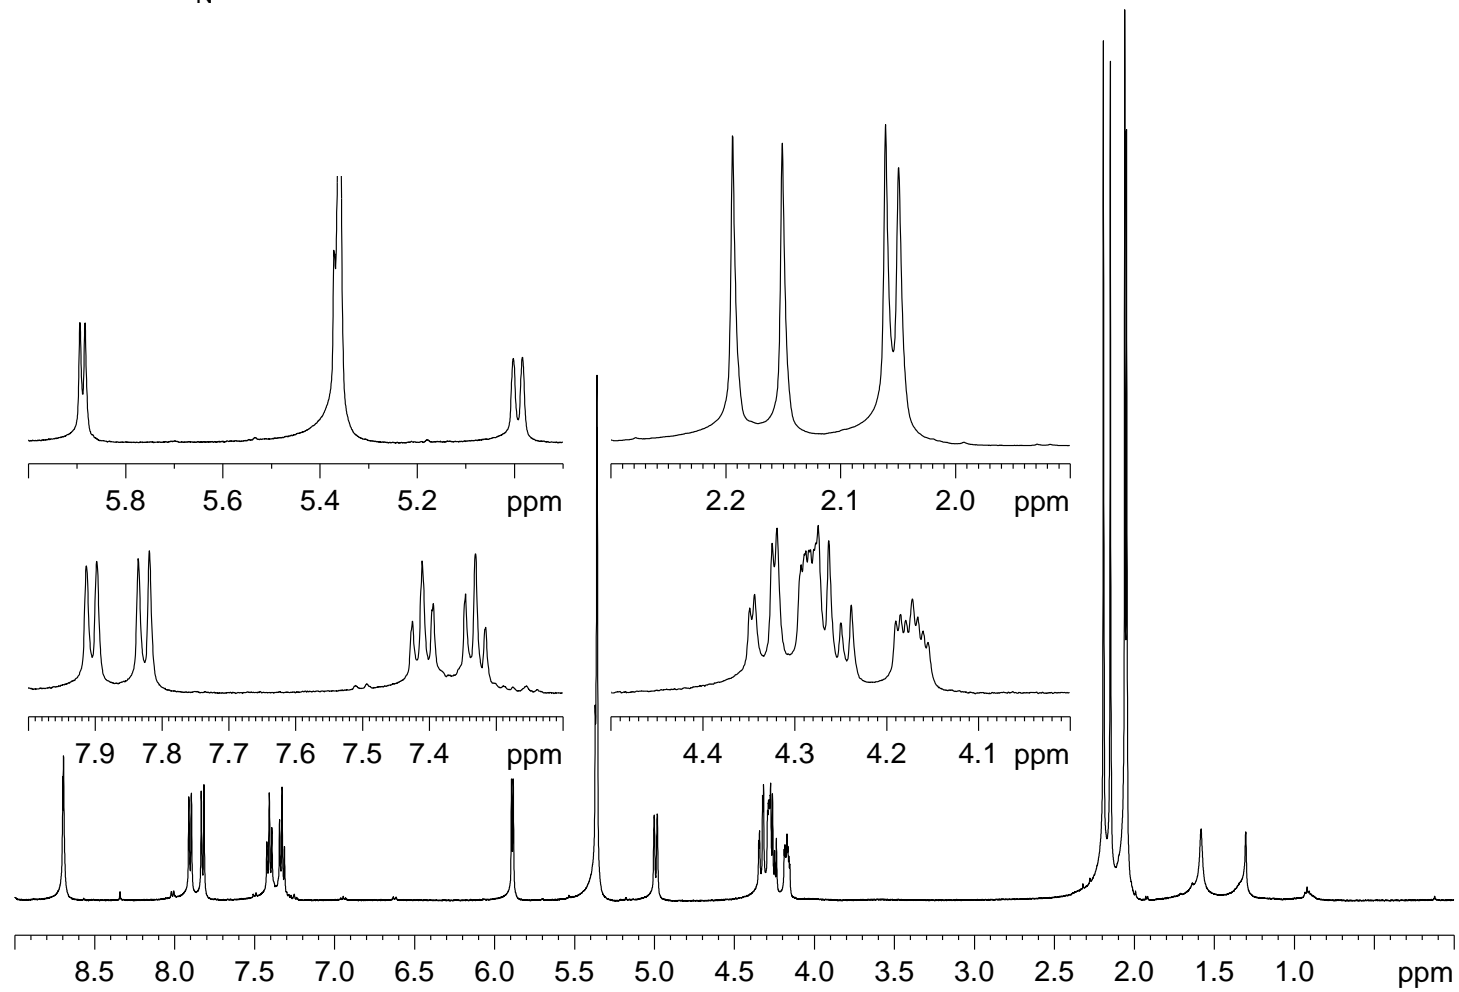

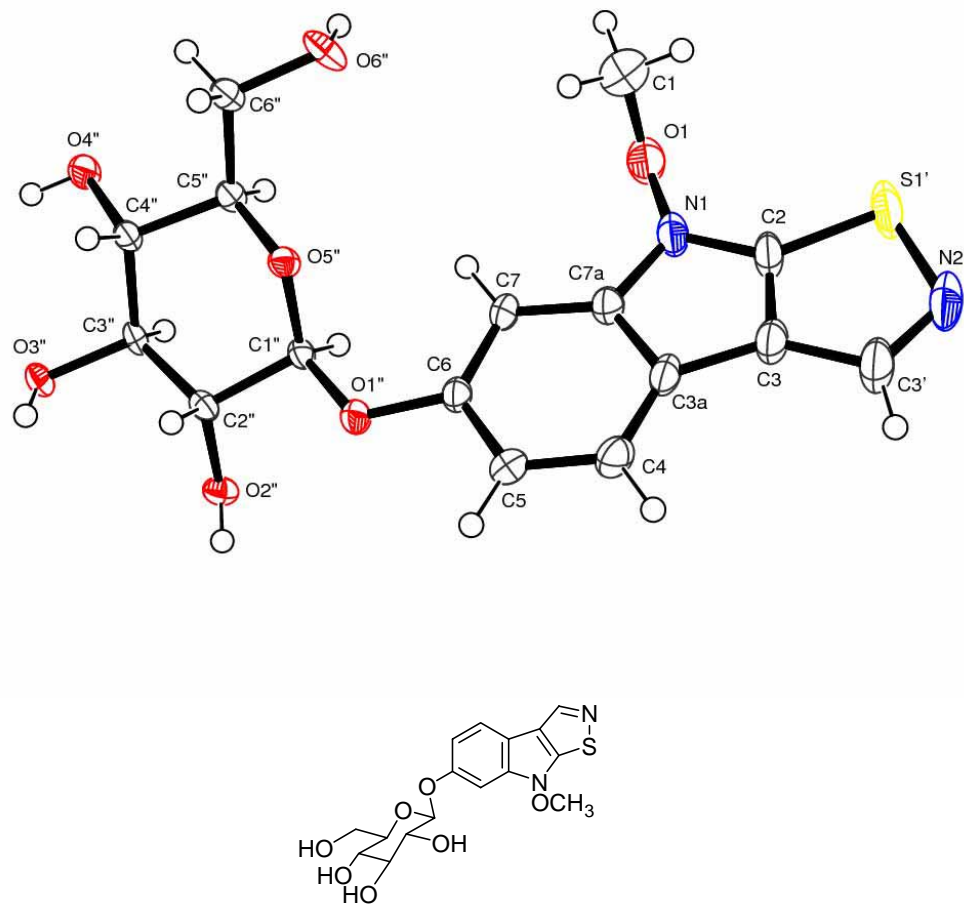

**Fig. 3** X-ray structure of 6-oxy-(*O*- $\beta$ -D-glucopyranosyl)sinalexin (**17**): general ORTEP-3 view with non-H atom displacement ellipsoids drawn at the 50% probability level. The H atoms are drawn as small spheres of arbitrary size.

|                                   |                                                                 |                                |
|-----------------------------------|-----------------------------------------------------------------|--------------------------------|
| Empirical formula                 | C <sub>16</sub> H <sub>18</sub> N <sub>2</sub> O <sub>7</sub> S |                                |
| Formula weight                    | 382.38                                                          |                                |
| Temperature                       | 173(2) K                                                        |                                |
| Wavelength                        | 0.71073 Å                                                       |                                |
| Crystal system                    | Monoclinic                                                      |                                |
| Space group                       | P 21                                                            |                                |
| Unit cell dimensions              | a = 13.8821(3) Å                                                | $\alpha = 90^\circ$ .          |
|                                   | b = 4.5502(2) Å                                                 | $\beta = 109.8086(17)^\circ$ . |
|                                   | c = 14.6589(4) Å                                                | $\gamma = 90^\circ$ .          |
| Volume                            | 871.16(5) Å <sup>3</sup>                                        |                                |
| Z                                 | 2                                                               |                                |
| Density (calculated)              | 1.458 Mg/m <sup>3</sup>                                         |                                |
| Absorption coefficient            | 0.228 mm <sup>-1</sup>                                          |                                |
| F(000)                            | 400                                                             |                                |
| Crystal size                      | 0.20 x 0.05 x 0.05 mm <sup>3</sup>                              |                                |
| Theta range for data collection   | 1.75 to 27.48°.                                                 |                                |
| Index ranges                      | -18<=h<=17, -4<=k<=5, -19<=l<=18                                |                                |
| Reflections collected             | 10196                                                           |                                |
| Independent reflections           | 3438 [R(int) = 0.0632]                                          |                                |
| Completeness to theta = 27.48°    | 99.7 %                                                          |                                |
| Absorption correction             | Psi-scan                                                        |                                |
| Max. and min. transmission        | 0.989 and 0.925                                                 |                                |
| Refinement method                 | Full-matrix least-squares on F <sup>2</sup>                     |                                |
| Data / restraints / parameters    | 3438 / 1 / 239                                                  |                                |
| Goodness-of-fit on F <sup>2</sup> | 1.058                                                           |                                |
| Final R indices [I>2sigma(I)]     | R1 = 0.0471, wR2 = 0.1037                                       |                                |
| R indices (all data)              | R1 = 0.0559, wR2 = 0.1090                                       |                                |
| Absolute structure parameter      | 0.10(12)                                                        |                                |
| Largest diff. peak and hole       | 0.324 and -0.320 e.Å <sup>-3</sup>                              |                                |
